# Supplementary material
Source: Springer Nature journal article supplement (https://www.springermedizin.de/resource/supplementary/13024_2011_351_MOESM6_ESM.pdf/9643756)

**A**

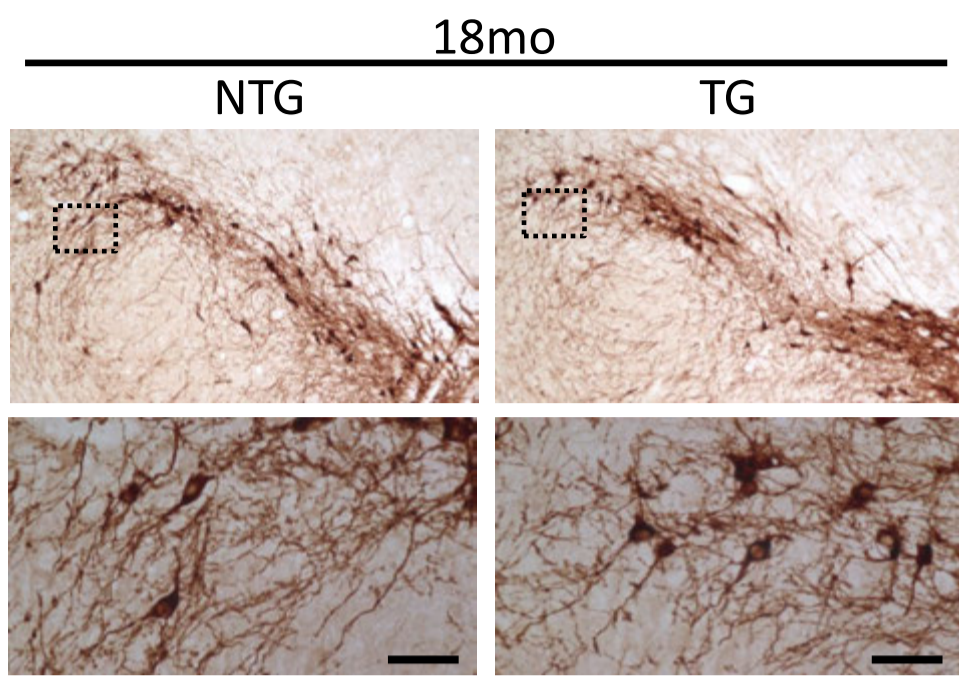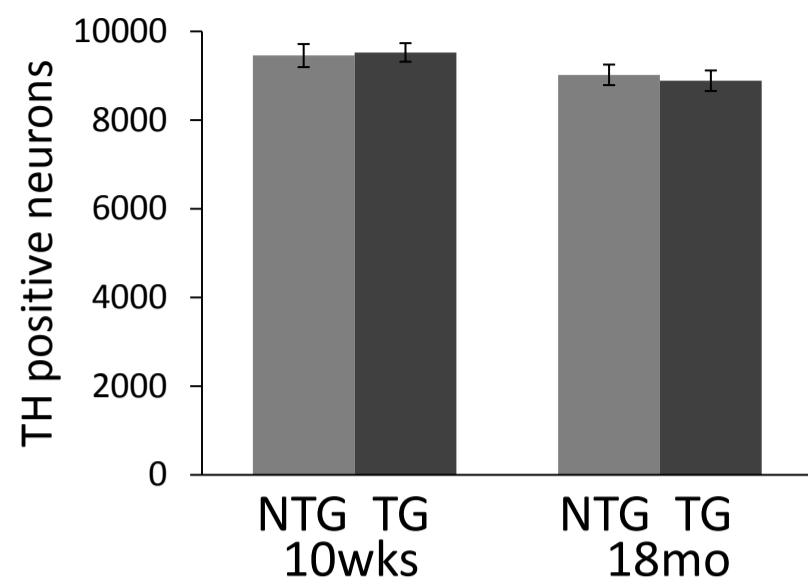

**B**

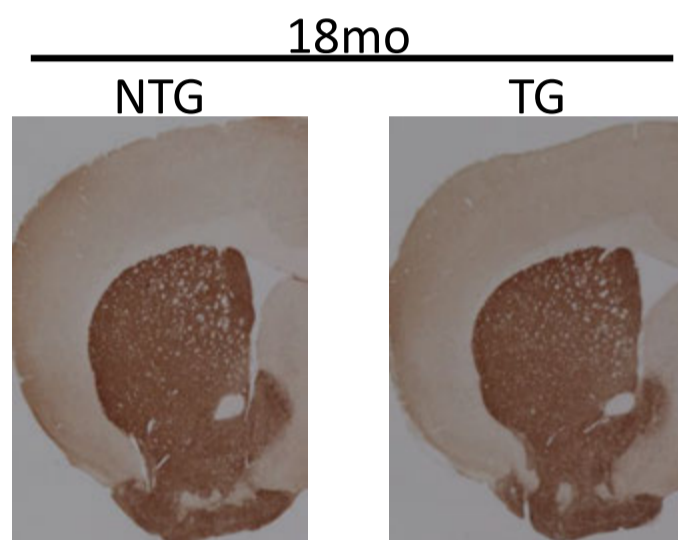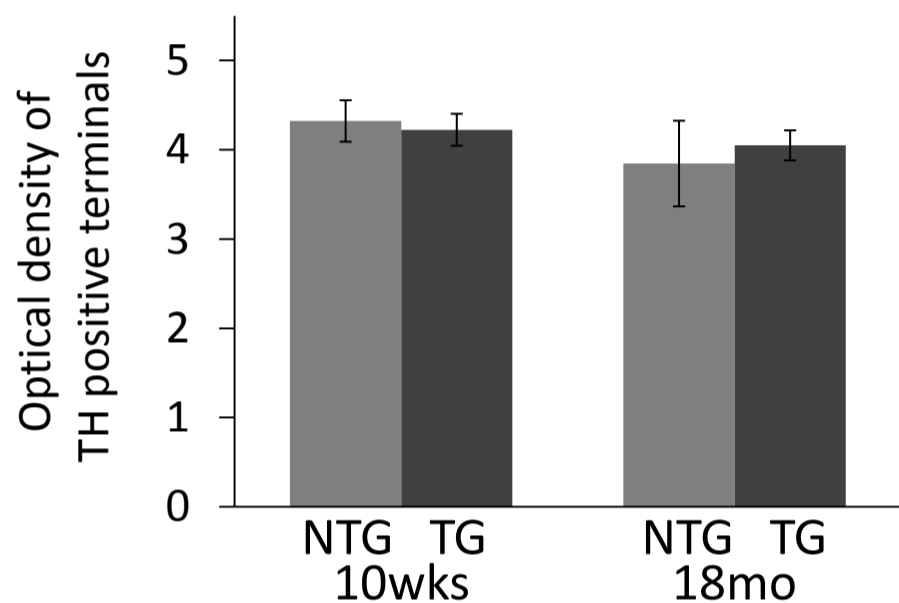

**C**

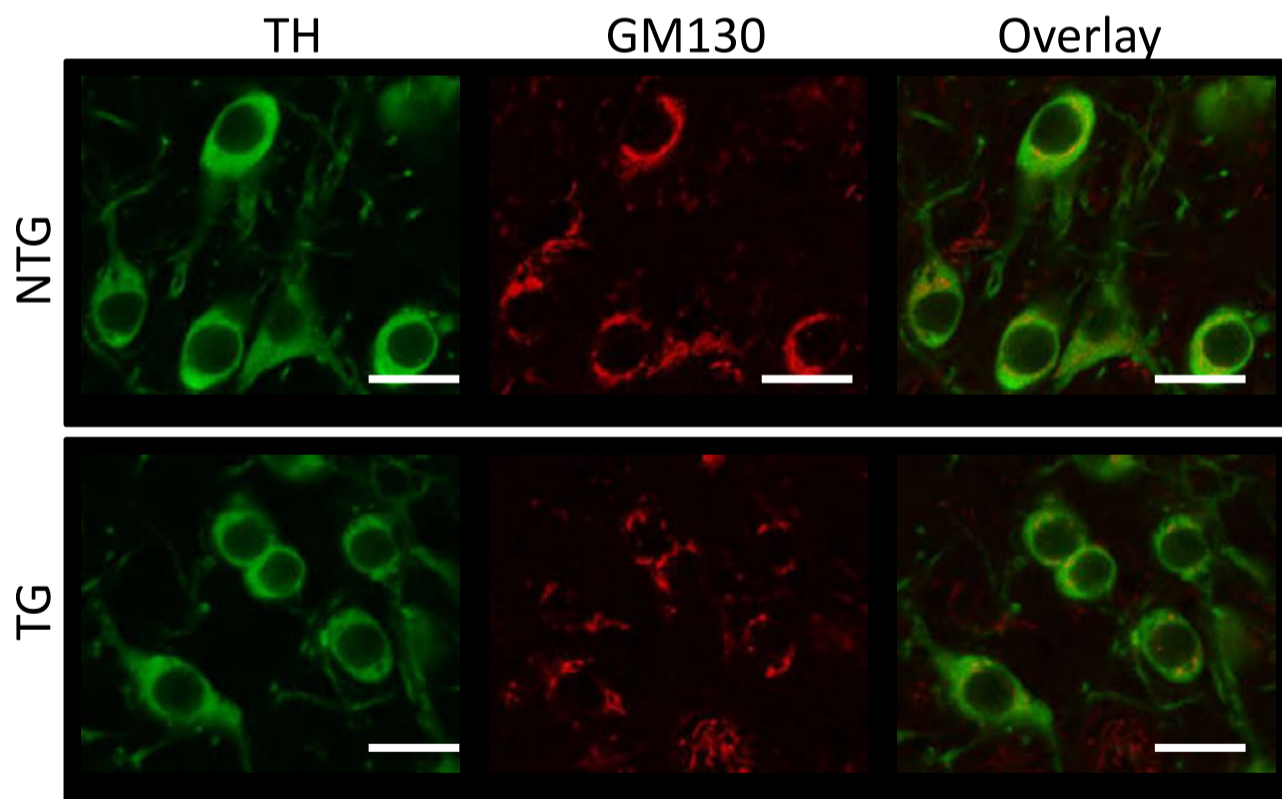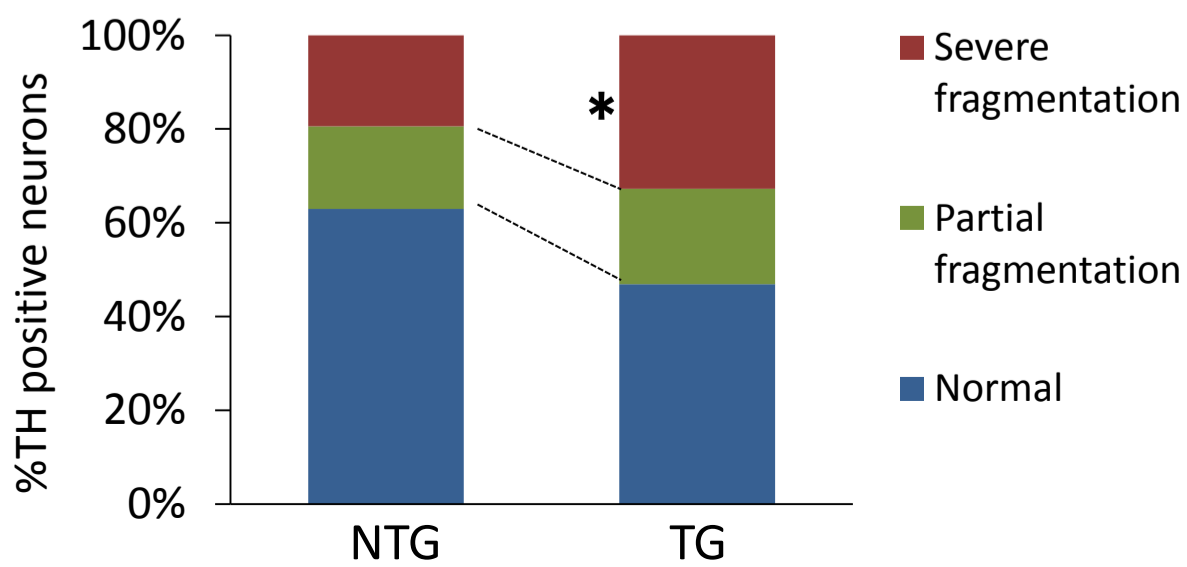

Supplement: MOESM6 [file 9643756]
